# Supplementary material for: Self-assembly of a twelve-component hexanuclear metallomacrocycle constructed with a novel tri-amino ligandElectronic supplementary information (ESI) available: experimental details. See http://www.rsc.org/suppdata/cc/b2/b209493m/
Source: Royal Society of Chemistry journal article supplement (doi:10.1039/b209493m), 2002-10-31
Supplement: b209493m.doc [file b209493m.doc]

# Supplementary data

Self-assembly of a twelve-component hexanuclear metallomacrocycle constructed with a novel tri-amino ligand

Georg Seeber1, Benson Kariuki2 and Leroy Cronin1*

1Department of Chemistry, The University of Glasgow, University Avenue, Glasgow, G12 8QQ, UK. Fax +44 141 330 6650; Tel: +44 141 330 6650; E-mail: [L.Cronin@chem.gla.ac.uk](mailto:L.Cronin@chem.gla.ac.uk)

2School of Chemical Sciences, The University of Birmingham, Edgbaston, Birmingham, West Midlands, B15 2TT

**Synthesis**: [Pd6(**L2**)6Cl12] (**1**): To an aqueous solution (200 ml) of **L2**.3HCl (357 mg, 1.50 mmol), PdCl2 (399 mg, 2.25 mmol ) was added and the resulting yellow solution refluxed for 10 days. After this time the solution was neutralised with sodium hydroxide. Reduction of the mixture to a volume of 25 ml and crystallisation over 3 days afforded **1** as yellow crystals, 136 mg, 0.07 mmol, 30% yield.

This *trans*-tach (**L2**) unit represents all three chemically different units in the ring structure by adding the number (1, 2 or 3) of the corresponding unit:

NOTE. Ha, Hb and Hc in the text correspond to Ha1, Ha2 and Ha3. Hd in the text corresponds to Hb2.

# Analytical data for compound 1

*Selected data for* **1**: IR (solid):*/cm-1* 3379(b), 3206(vs), 3128(vs), 2924(m), 2855(w), 1582(vs), 1454(m), 1435(m), 1361(s), 1285(w), 1269(w), 1223(m), 1138(bs), 1111(s), 1084(m), 1053(s), 1030(m), 930(s), 883(m), 750(bs), 625(bs), 560(bvs). 1H-NMR (D2O, 500 MHz): ** 6.21 (1 H, ptt, *J* 12.7, 4.5 Hz, Ha1), 5.45 (1 H, ptt, *J* 12.7, 4.5 Hz, Ha2), 5.35 (1 H, ptt, *J* 12.7, 4.5 Hz, Ha3), 4.52 (bs, NH2), 4.19 (bs, NH2), 3.25-2.92 (9 H, m), 2.65 (1 H, bd, *J* 13.4 Hz, Hb2), 2.11-1.89 (5 H, m), 1.71-1.39 (9 H, m). 13C-NMR (D2O, 500 MHz): ** 46.91 (CHa3), 46.79 (CHa2), 46.66 (CHa1), [45.88, 45.39 (two), 44.93, 44.54, 44.27 (6 CHd/d’)], 38.83 (CHb2,c2), [38.73 (two), 38.10 (two), 37.93 (two), 33.93, 33.88 (8 CH2)]. Anal. Calc. for [C6H15N3Cl2Pd]6.6H2O: C,22.20; H,5.28; N,12.95. Found: C,22.05; H,5.41; N,12.84 %.

Notes:

**1 Mass spectroscopic Data:** No molecular ion peak corresponding to **1** was found despite employing a variety of techniques including CI, EI, FAB, MALDI and ES-TOF. However, each technique gave rise to different peaks that can be attributed to the decomposition / re-speciation of the cluster.

**2 NMR data:** 1H-NMR spectra were collected at 25 and 65 °C and gave identical spectra. However, at 90 °C the complex appeared to decompose into mono- and multinuclear fragments. Also COSY90 and HOHAHA experiments were done at 27 °C with partial HOD presaturation and ref ext TSP capillary. **The spectra and the expansions are given in the next four pages:**

Assignment of Ha as the most deshielded proton in the spectrum; this assignment is supported by comparison of the proton NMR of the cluster with that of the free ligand and also the monomeric tach complex {Pd(tach)Cl2} which we have synthesised and characterised.1 Furthermore, the observation that the methine protons (R2(C***H***)NH2-) in the axial positions of the cyclohexane rings are deshielded by their proximity to the Pd(II) ion has been reported earlier by workers examining the proton NMR data from an analogous ligand, (dach) – 1,3-diamino-cyclohexane and the complex {Pd(dach)Cl2}.2

(1) Georg Seeber, Benson Kariuki and Leroy Cronin, *in preparation 2002.*

(2) Reiko Saito and Yoshinori Kidani, *Chem. Lett.,* 1977, 1141.

Spectral data from a HOHAHA experiment with a 150 ms spin lock period and a 10 KHz spin lock field.

The dotted lines show the correlation between Ha2 and Hb2 (Hb and Hd in the manuscript).

Expansion 1

Expansion 2- the three sets of cyclohexane backbone protons corresponding to

Ha1, Ha2 and Ha3

COSY 90 in the region of 1 to 3.5 ppm
